# Supplementary material for: A prophage tail-like protein is deployed by Burkholderia bacteria to feed on fungi
Source: Nat Commun. 2017 Sep 1;8:404. doi: 10.1038/s41467-017-00529-0 (PMC5581363; doi:10.1038/s41467-017-00529-0)
Supplement: Supplementary file 1 — Supplementary Information [file 41467_2017_529_MOESM1_ESM.pdf]

### **Description of Supplementary Files**

File Name: Supplementary Information

Description: Supplementary Tables and Supplementary Figures

File Name: Peer Review File

**Supplementary Table 1: *B. gladioli* strain NGJ1 prevents formation of *R. solani* sclerotia, during confrontation**

|                                                | <b>No of sclerotia formed on PDA plates<sup>a</sup></b> |                 |                 |                 |                 |
|------------------------------------------------|---------------------------------------------------------|-----------------|-----------------|-----------------|-----------------|
|                                                | <b>Repeat 1</b>                                         | <b>Repeat 2</b> | <b>Repeat 3</b> | <b>Repeat 4</b> | <b>Repeat 5</b> |
| <b><i>R. solani</i></b>                        | <b>190</b>                                              | <b>170</b>      | <b>185</b>      | <b>175</b>      | <b>198</b>      |
| <b><i>R. solani</i> +<br/>NGJ1<sup>b</sup></b> | <b>1</b>                                                | <b>4</b>        | <b>10</b>       | <b>9</b>        | <b>5</b>        |

<sup>a</sup>; No. of sclerotia formed on PDA plates after 7 days of confrontation with NGJ1

<sup>b</sup>; Sclerotia collected from the NGJ1 confrontation plates failed to germinate when grown on fresh PDA plate

**Supplementary Table 2: *B. gladioli* strain NGJ1 treatment prevents germination of *R. solani* sclerotia**

|                                                                        | Repeat 1 <sup>a</sup> | Repeat 2 <sup>a</sup> | Repeat 3 <sup>a</sup> |
|------------------------------------------------------------------------|-----------------------|-----------------------|-----------------------|
| <i>R. solani</i>                                                       | 5/5                   | 5/5                   | 5/5                   |
| <i>R. solani</i> + heat killed NGJ1 (10 <sup>9</sup> cells/ml) culture | 5/5                   | 5/5                   | 5/5                   |
| <i>R. solani</i> + 10 <sup>9</sup> cells/ml NGJ1 culture               | 0/5                   | 0/5                   | 0/5                   |
| <i>R. solani</i> + 10 <sup>7</sup> cells/ml NGJ1 culture               | 0/5                   | 0/5                   | 0/5                   |
| <i>R. solani</i> + 10 <sup>5</sup> cells/ml NGJ1 culture*              | 2/5                   | 3/5                   | 1/5                   |
| <i>R. solani</i> + 10 <sup>3</sup> cells/ml NGJ1 culture*              | 5/5                   | 5/5                   | 5/5                   |

<sup>a</sup>: no of germinating/total no. of treated *R. solani* sclerotia on PDA plate

\*: Although a few bacterial treated sclerotia could germinate initially but subsequently NGJ1 grew over them and prevented their growth

**Supplementary Table 3: List of fungi used in this study**

| <b>Sr. no.</b> | <b>Fungal strain</b>                  | <b>Growth temperature (°C)</b> | <b>Media</b> | <b>Source</b>  |
|----------------|---------------------------------------|--------------------------------|--------------|----------------|
| <b>1</b>       | <i>Rhizoctonia solani</i> strain BRS1 | 28                             | PDA          | Lab collection |
| <b>2</b>       | <i>R. solani</i> strain BRS8          | 28                             | PDA          | Lab collection |
| <b>3</b>       | <i>R. solani</i> strain BRS9          | 28                             | PDA          | Lab collection |
| <b>4</b>       | <i>Alternaria brassicae</i>           | 28                             | PDA          | ITCC (IARI)    |
| <b>5</b>       | <i>Magnaporthe oryzae</i>             | 22                             | PDA          | Lab collection |
| <b>6</b>       | <i>Venturia inaequalis</i>            | 22                             | PDA          | Lab collection |
| <b>7</b>       | <i>Fusarium oxysporum</i> 549         | 28                             | PDA          | Lab collection |
| <b>8</b>       | <i>F. oxysporum</i> 7063              | 28                             | PDA          | Lab collection |
| <b>9</b>       | <i>Dedymella</i> sp.                  | 28                             | PDA          | Lab collection |
| <b>10</b>      | <i>Phytophthora</i> sp.               | 25                             | PDA          | ITCC (IARI)    |
| <b>11</b>      | <i>Colletotrichum</i> sp.             | 28                             | PDA          | Lab collection |
| <b>12</b>      | <i>Ascochyta rabiei</i>               | 22                             | PDA          | Lab collection |
| <b>13</b>      | <i>Neofusicoccum</i> sp.              | 28                             | PDA          | Lab collection |
| <b>14</b>      | <i>Alternaria</i> sp.                 | 28                             | PDA          | Lab collection |
| <b>15</b>      | <i>Saccharomyces cerevisiae</i>       | 28                             | YPDA         | Lab collection |
| <b>16</b>      | <i>Candida albicans</i>               | 37                             | YPDA         | Lab collection |

**Supplementary Table 4: List of bacterial strains, plasmids and primers**

| Strains or plasmid                    | Relevant characteristics                                                                                     | Source         |
|---------------------------------------|--------------------------------------------------------------------------------------------------------------|----------------|
| <b><i>E. coli</i> strains</b>         |                                                                                                              |                |
| DH5α                                  | F <sup>+</sup> , endA1 hsdR17 (rk- mk+) supE44 thi-1 recA1 gyrA<br>TelA1 cp8OdlacZAM15 A (lacZY A-argF) U169 | Lab collection |
| S17-1                                 | RP4-2-Tc::Mu-Km::Tnl pro hsdRrecA                                                                            | Lab collection |
| BL-21                                 | DE3-Codon+                                                                                                   | Lab collection |
| <b><i>B. gladioli</i> strains</b>     |                                                                                                              |                |
| NGJ-1                                 | Natural isolate                                                                                              | Lab collection |
| NGJ-100                               | <i>Bg_9562</i> ::pGD2 rif-2; <i>Bg_9562</i> , Km <sup>r</sup> derivative of NGJ-2                            | Current study  |
| NGJ-101                               | <i>Bg_9562</i> ::pGD2 rif-2; <i>Bg_9562</i> , Km <sup>r</sup> derivative of NGJ-2                            | Current study  |
| NGJ-2                                 | <i>rif-2</i> , Rf <sup>r</sup> derivative of NGJ-1                                                           | Current study  |
| NGJ-102                               | NGJ-100/pGD3                                                                                                 | Current study  |
| NGJ-103                               | NGJ-101/pGD3                                                                                                 | Current study  |
| NGJ-12                                | <i>HrcC</i> ::pGD4 rif-2; T3S <sup>+</sup> , Km <sup>r</sup> HR <sup>r</sup> derivative of NGJ-2             | Current study  |
| NGJ-13                                | <i>HrcC</i> ::pGD4 rif-2; T3S <sup>+</sup> , Km <sup>r</sup> HR <sup>r</sup> derivative of NGJ-2             | Current study  |
| <b><i>R. solanacearum</i> strains</b> |                                                                                                              |                |
| F1C1                                  | Natural isolate                                                                                              | Lab collection |
| F1C1N2                                | <i>HrpB</i> ::ΩSpc T3S <sup>+</sup> , Sp <sup>r</sup> , HR <sup>r</sup> derivative of F1C1                   | Lab collection |
| F1C1N3                                | F1C1/pGD3                                                                                                    | Current study  |
| F1C1N4                                | F1C1N2/pGD3                                                                                                  | Current study  |
| <b><i>Pantoea ananatis</i></b>        | Natural isolate                                                                                              | Lab collection |
| <b>Plasmids</b>                       |                                                                                                              |                |
| pET28a                                | Kanamycin, 5.320kb, colE1                                                                                    | Lab collection |
| PK18mob                               | pUC18 derivative; Mob <sup>+</sup> Tra <sup>-</sup> Km <sup>r</sup>                                          | Lab collection |
| pGD1                                  | pET28a:: <i>Bg_9562</i>                                                                                      | Current study  |
| pGD2                                  | pK18mob:: <i>Bg_9562</i> partial                                                                             | Current study  |
| pHM1                                  | Broad-host-range cosmid vector (13.3 kb); Sp <sup>r</sup>                                                    | Lab collection |
| pGD3                                  | pHM1:: <i>Bg_9562</i>                                                                                        | Current study  |
| pGD4                                  | pK18mob:: <i>hrcC</i> partial                                                                                | Current study  |
| <b>List of primers</b>                |                                                                                                              |                |
| <i>Bg_9562</i> f F1                   | 5' CATATGAACACGGAACAGGAT 3'                                                                                  | Current study  |
| <i>Bg_9562</i> f R1                   | 5' AAGCTTCGCGCTCGGGGATTCCATGCT 3'                                                                            | Current study  |
| <i>Bg_9562</i> p F 2                  | 5' GAATTCATGCCGCGCGCTGCGCGGC 3'                                                                              | Current study  |
| <i>Bg_9562</i> p R 2                  | 5' AAGCTTGCTCGGGGATTCCATGCTCGCT 3'                                                                           | Current study  |
| <i>Bg_9562</i> cf F3                  | 5' AAGCTTAACACGGAACAGGAT 3'                                                                                  | Current study  |
| <i>Bg_9562</i> cf R3                  | 5' GAATCCGCGCTCGGGGATTCCATGCT 3'                                                                             | Current study  |
| M13 fwd                               | 5' TGTAAACGACGGCCAGT 3'                                                                                      | Current study  |
| M13 rev                               | 5' AGGAAACAGCTATGACCAT 3'                                                                                    | Current study  |
| <i>hrcCF</i>                          | 5' GAATTCATGTACAGCGTGAAGTCGGG 3'                                                                             | Current study  |
| <i>hrcCR</i>                          | 5' AAGCCTATCACCGGAATGTCGTCCAC 3'                                                                             | Current study  |
| <i>Hrccf1</i>                         | 5' ATG AGAGCGAAGAAGCTTGTTGC                                                                                  | Current study  |

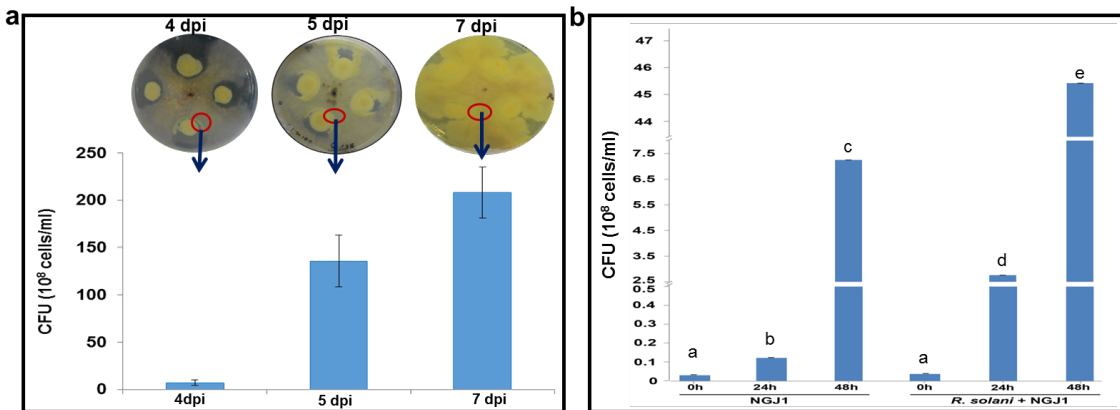

**Supplementary Figure 1. Presence of *R. solani* mycelia promotes the growth of *B. gladioli* strain NGJ1.** **a**, The NGJ1 was found growing over *R. solani* mycelia during confrontation on PDA plates. The bacterial abundance on fungal mycelia was estimated at different time points (4, 5 and 7 dpi) of confrontation and data is presented as bar chart. The photographs in the inset represent the progression of mycophagy on *R. solani*. The red circle reflects the sampling site used for bacterial counting. **b**, Bacterial growth in minimal media (CDB) with and without presence of *R. solani* mycelia at different time points. NGJ1 growth was drastically enhanced in presence of fungal mycelia. The experiments were independently repeated three times with minimum three technical replicates. Values with different letters are significantly different at  $P < 0.001$  (estimated using one-way ANOVA). Graphs show mean values  $\pm$  standard deviation.

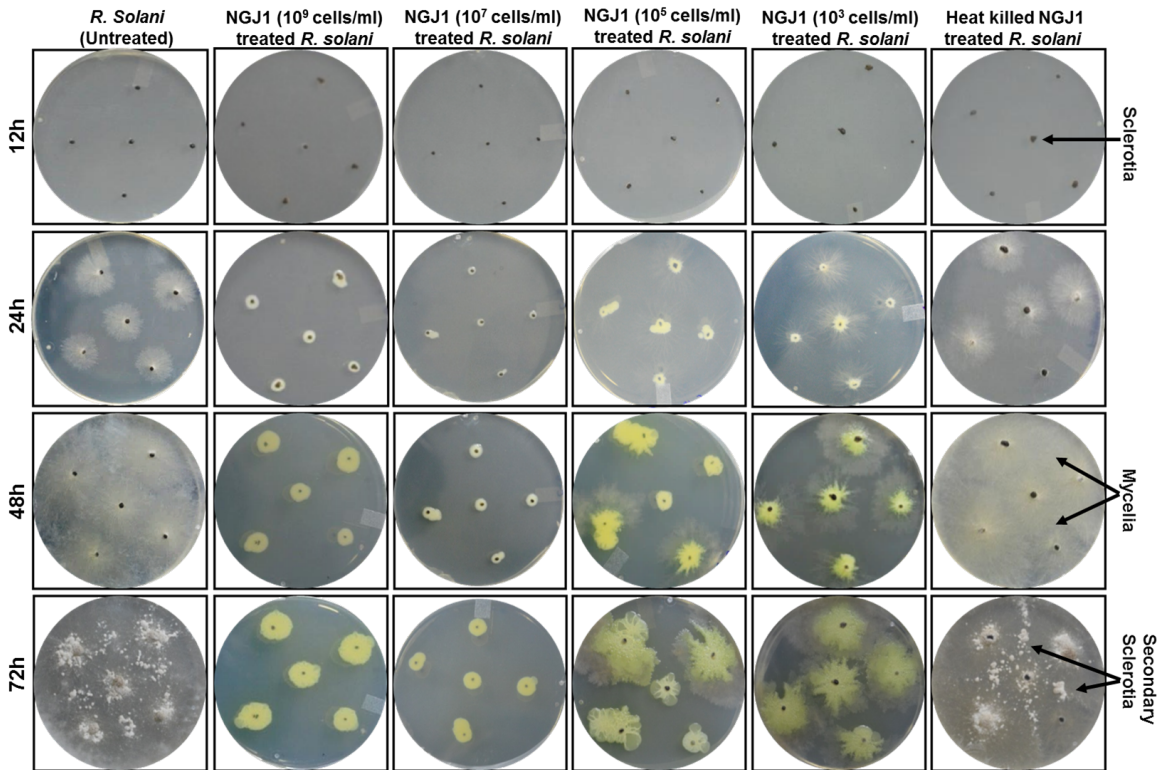

**Supplementary Figure 2. Effect of different concentrations of *B. gladioli* strain NGJ1 treatment on *R. solani* sclerotia.**  $10^9$  or  $10^7$  cells/ml NGJ1 treated *R. solani* sclerotia failed to germinate when placed on fresh PDA plates. Upon treatment with  $10^5$  or  $10^3$  cells/ml bacterial cultures, the sclerotia could initially germinate. But subsequently bacteria grew over fungal biomass and inhibited their further growth. However, the sclerotia that were either not treated with bacteria or treated with heat killed bacteria showed proper growth on PDA plates. Similar results were obtained in at least three independent biological experiments and only representative photographs are shown.

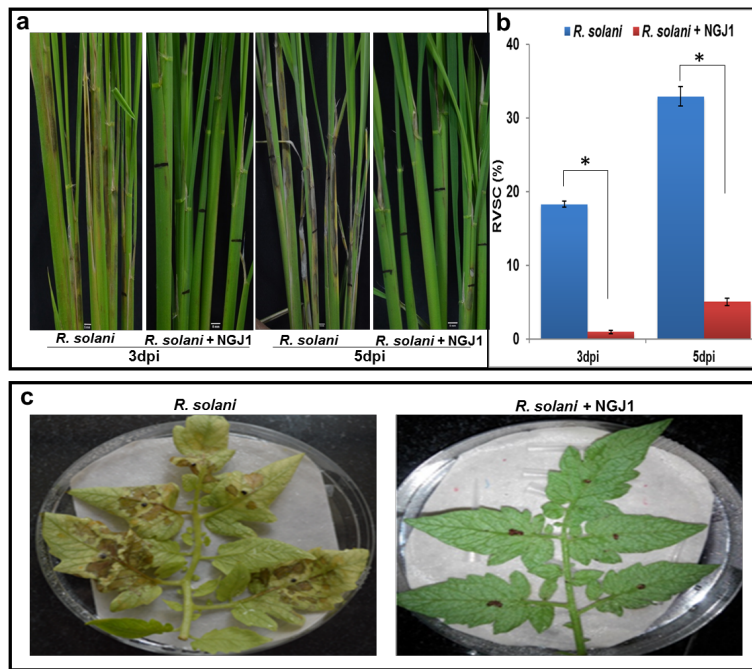

**Supplementary Figure 3. *B. gladioli* strain NGJ1 treatment suppresses disease causing ability of *R. solani*.** **a**, Representative images of rice sheath showing disease symptoms caused by NGJ1 ( $10^9$  cells/ml) treated or buffer (10mM PBS, pH: 7.0) treated *R. solani* sclerotia, at 3 dpi and 5 dpi. **b**, Disease index of infected rice sheath (cv. TP309) with bacteria or buffer treated *R. solani* sclerotia, in terms of relative vertical sheath colonization (RVSC). **c**, Representative images of tomato (cv. pusa ruby) leaves infected with *R. solani* sclerotia with or without bacterial treatment, at 3 dpi. The experiments were repeated three times and each time 15 tillers/leaves were analyzed. Asterisks indicate significant difference between indicated groups at  $P < 0.001$ , estimated by one-way ANOVA. Graphs show mean values  $\pm$  standard deviation.

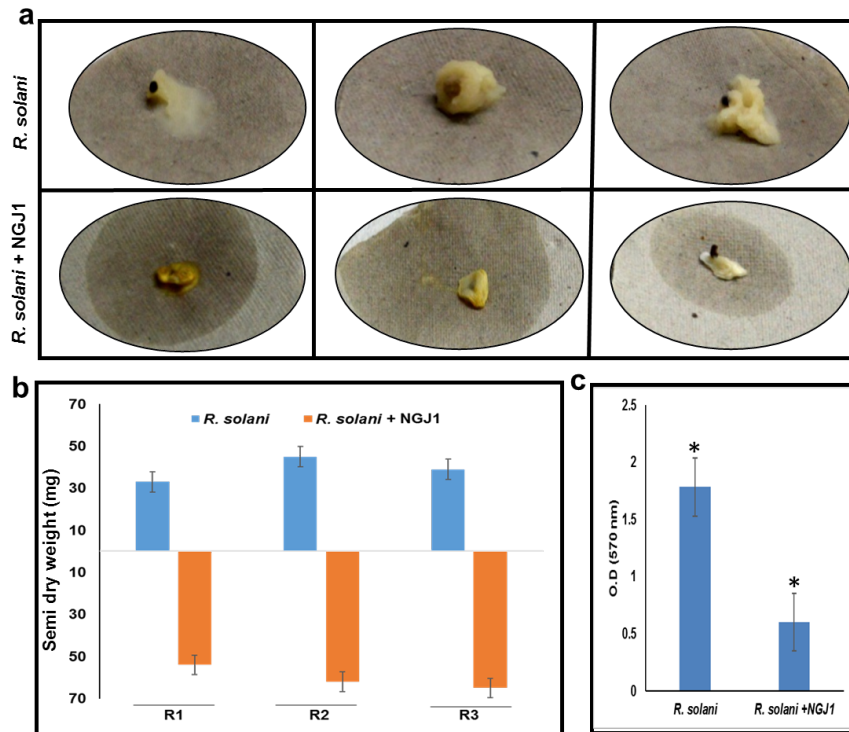

**Supplementary Figure 4. Effect of *B. gladioli* strain NGJ1 treatment on fungal biomass.** **a**, Observed *R. solani* biomass, with or without NGJ1 treatment after 48h of growth in PDB media. **b**, Graph representing reduction in fungal biomass upon NGJ1 treatment and increase in biomass in case of untreated *R. solani* mycelia, after 48h of growth in PDB media. R1, R2 and R3 represent data from 3 independent biological replicates. **c**, Cell viability estimated by MTT staining of NGJ1 treated and untreated mycelia. The experiments were repeated with three technical as well as biological replicates. Asterisks indicate statistical significant difference between indicated groups at  $P < 0.001$  (estimated by one-way ANOVA). Graphs show mean values  $\pm$  standard deviation.

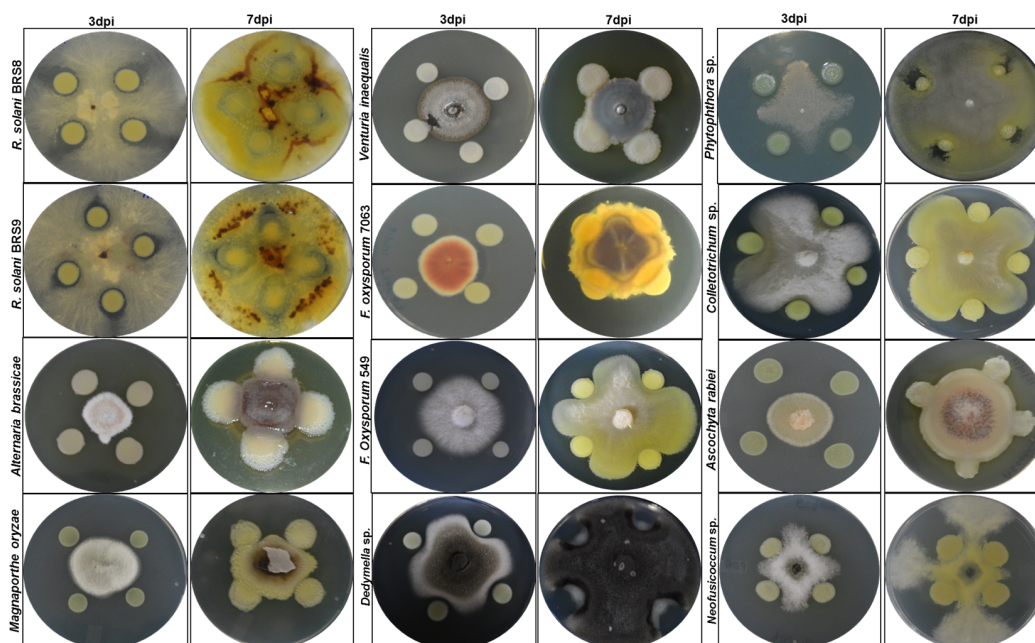

**Supplementary Figure 5. *B. gladioli* strain NGJ1 demonstrates mycophagy on various fungi.** The mycophagous behavior of NGJ1 was observed on various fungi including *Rhizoctonia solani* strain BRS8, *R. solani* strain BRS9, *Alternaria brassicae*, *Magnaporthe oryzae*, *Venturia inaequalis*, *Fusarium oxysporum* strain 7063, *F. oxysporum* strain 549, *Dydmella sp.*, *Phytophthora sp.*, *Colletotrichum sp.*, *Ascochyta rabiei*, *Neofusicoccum sp.* Images of bacterial-fungal confrontation at 3 and 7 dpi are represented. Similar results were obtained in at least three independent biological experiments and only representative photographs are shown.

**a. Genomic organization of T3SS encoding genes in *B. gladioli* NGJ1 genome**

| T3SS_cluster_type | Num_components | Core_Components<br>in_cluster | Total_Core_Comp_<br>NFT3SS | Perc_core |
|-------------------|----------------|-------------------------------|----------------------------|-----------|
| Non-flagellar     | 21             | 10                            | 9                          | 100%      |

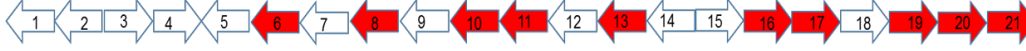

**b. Locus IDs and name of T3SS encoding genes in *B. gladioli* NGJ1 genome**

| Gene no. | Gene     | Locus I.D     | Protein                | Component | Accession No. |
|----------|----------|---------------|------------------------|-----------|---------------|
| 1        | orf_3833 | ACI79_RS25520 | HrpK                   | None core | WP_047838853  |
| 2        | orf_3834 | ACI79_RS25525 | PKHD type Hydroxylase  | Unknown   | WP_047838854  |
| 3        | orf_3835 | ACI79_RS25530 | DUF3455 domain protein | Unknown   | WP_047838855  |
| 4        | orf_3836 | ACI79_RS25535 | HrpG                   | Unknown   | WP_047838856  |
| 5        | orf_3837 | ACI79_RS25540 | HrpW                   | Unknown   | WP_047838857  |
| 6        | orf_3838 | ACI79_RS25545 | HrcC                   | Core      | WP_013689095  |
| 7        | orf_3839 | ACI79_RS25550 | HrpB                   | Non core  | WP_047839013  |
| 8        | orf_3840 | ACI79_RS25555 | HrcT                   | Core      | WP_047838858  |
| 9        | orf_3841 | ACI79_RS25560 | HrpB7/HrpD             | Non core  | WP_047838859  |
| 10       | orf_3842 | ACI79_RS25565 | HrcN                   | core      | WP_036054803  |
| 11       | orf_3843 | ACI79_RS25570 | HrcL                   | core      | WP_047838860  |
| 12       | orf_3844 | ACI79_RS25575 | HrpB4/HrpH             | Non core  | WP_053062820  |
| 13       | orf_3845 | ACI79_RS25580 | HrcI/HrcJ              | Core      | WP_047838862  |
| 14       | orf_3846 | ACI79_RS25585 | HrpB2/HrpJ             | Non core  | WP_047838863  |
| 15       | orf_3847 | ACI79_RS25590 | HrpB1/HrpK             | Non core  | WP_013689086  |
| 16       | orf_3848 | ACI79_RS25595 | HrcU                   | Core      | WP_017921746  |
| 17       | orf_3849 | ACI79_RS25600 | HrcV                   | Core      | WP_047838864  |
| 18       | orf_3850 | ACI79_RS25605 | HpaP                   | Unknown   | WP_047838865  |
| 19       | orf_3851 | ACI79_RS25610 | HrcQ                   | Core      | WP_053062813  |
| 20       | orf_3852 | ACI79_RS25615 | HrcR                   | Core      | WP_013689081  |
| 21       | orf_3853 | ACI79_RS25620 | HrcS                   | Core      | WP_013689080  |

**Supplementary Figure 6. *B. gladioli* strain NGJ1 harbors genes potentially encoding Type III secretion system.** **a**, Genomic organization of T3SS encoding genes in *B. gladioli* NGJ1 genome. Out of 21 different genes, 10 were found to encode the core components of T3SS apparatus. There was 100% (9/9) conservation of core components that are associated with a functional non-flagellar type of T3SS apparatus (<http://bacterial-virulence-factors.cbgp.upm.es/T346Hunter>). **b**, The gene name, locus ID, encoded protein, predicted role in T3SS apparatus as well as corresponding accession number as per *Burkholderia* genome database (<http://www.burkholderia.com>) are mentioned.

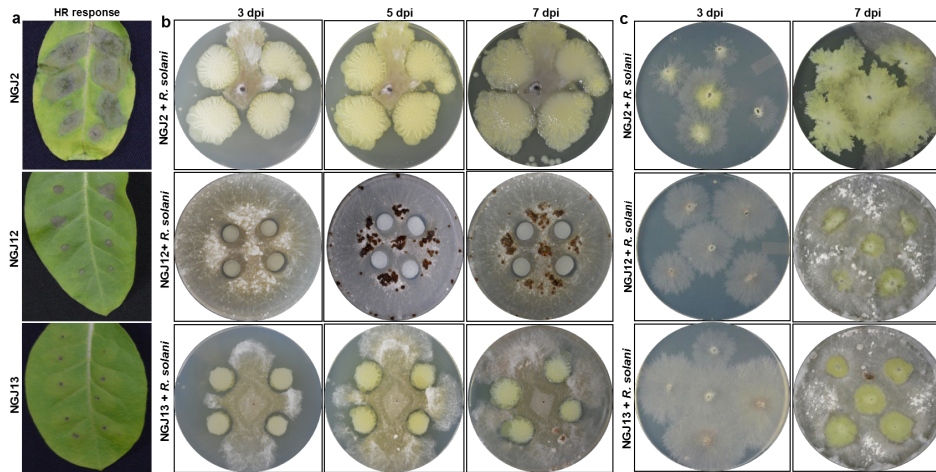

**Supplementary Figure 7. T3SS deficient mutant strains of *B. gladioli* strain NGJ1 are defective in mycophagy.** **a**, HR response in *Nicotiana benthamiana* leaves infiltrated with different *B. gladioli* strains. Both T3SS mutants (NGJ12 and NGJ13) were unable to elicit HR response, while the NGJ2 (*rif<sup>R</sup>* derivative of NGJ1) elicited HR. **b**, The confrontation of T3SS mutants with *R. solani* on PDA plates. Both T3SS mutants failed to demonstrate mycophagy while NGJ2 exhibited mycophagy. **c**, The T3SS mutants were defective in mycophagy even at lower dilution. The *R. solani* sclerotia treated with  $10^5$  cells/ml culture of T3SS mutant bacteria failed to inhibit fungal growth and could not forage over growing mycelia. On the other hand, the NGJ2 ( $10^5$  cells/ml) treatment prevented sclerotial growth and demonstrated mycophagy. Similar results were obtained in at least three independent experiments.

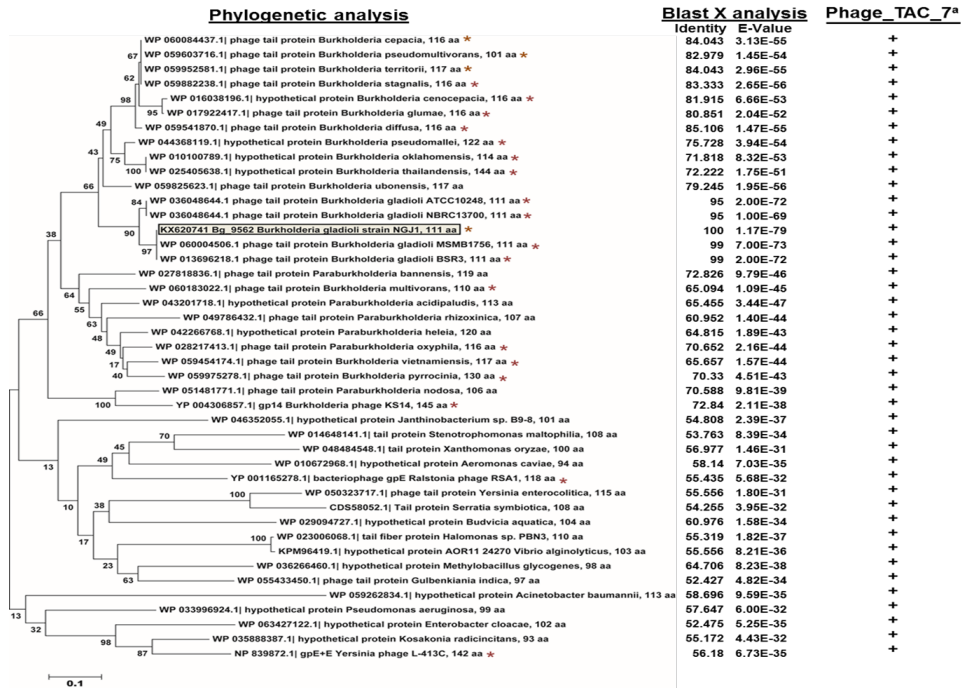

<sup>a</sup> CDD: NCBI conserved domain database was used to identify the conserved domain present in different orthologs  
 '+' sign indicates the presence of Phage\_TAC\_7 domain

**Supplementary Figure 8. Phylogenetic and blastX analysis reflecting the similarity of Bg\_9562 protein with other phage tail proteins.** The evolutionary analysis of different phage tail proteins were conducted in MEGA6 and distances were computed using the JTT matrix-based method. The evolutionary tree was inferred using Neighbor-Joining method with bootstrap test (100 replicates). The Bg\_9562 protein as well as its different orthologs were found to be of similar length (number indicates amino acid length). The Bg\_9562 homologs that are located in apparent bacteriophage cluster in different bacteria are highlighted with asterisks. Percentage identity and the E-value of Bg\_9562 protein with phage tail proteins of different bacterial strains are shown next to corresponding branches. Presence of conserved phage\_TAC\_7 domain, generally present in bacteriophage phage tail protein Gp41, was detected in Bg\_9562 protein as well as its various orthologs.

**a. Genomic organization of *Bg\_9562* gene in NGJ1 draft genome**

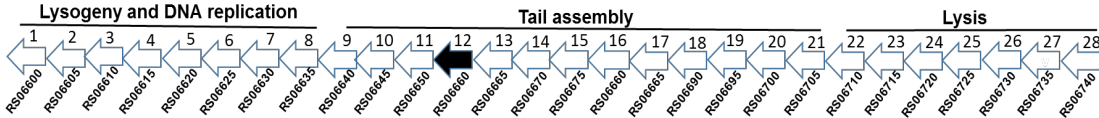

**b. The *Bg\_9562* gene homologs in different *B. gladioli* strains are located in bacteriophage cluster**

| Gene | NGJ1                             | ATCC 10248                       | NBRC13700                        | MSMB1756                    | BSR3                                     |
|------|----------------------------------|----------------------------------|----------------------------------|-----------------------------|------------------------------------------|
| 1    | Integrase                        | Integrase                        | Integrase                        | Integrase                   | Integrase                                |
| 2    | Zing finger CHC2 type protein    | Hypothetical protein             | Zing finger CHC2 type protein    | Hypothetical protein        | Hypothetical protein                     |
| 3    | Hypothetical protein             | Hypothetical protein             | Hypothetical protein             | Hypothetical protein        | Hypothetical protein                     |
| 4    | Hypothetical protein             | Hypothetical protein             | Hypothetical protein             | Transcriptional regulator   | Zing finger CHC2 type protein            |
| 5    | Transcriptional regulator        | Transcriptional regulator        | Transcriptional regulator        | Hypothetical protein        | Hypothetical protein                     |
| 6    | Hypothetical protein             | Hypothetical protein             | XRE transcriptional regulator    | Phage late control protein  | putative phage transcriptional activator |
| 7    | XRE transcriptional regulator    | XRE transcriptional regulator    | Hypothetical protein             | Oxidoreductase              | Hypothetical protein                     |
| 8    | Hypothetical protein             | Hypothetical protein             | Phage late control protein       | Hypothetical protein        | Hypothetical protein                     |
| 9    | Phage late control protein       | Phage late control protein       | Oxidoreductase                   | Phage tail protein          | Fels-2 prophage protein                  |
| 10   | Oxidoreductase                   | Oxidoreductase                   | Hypothetical protein             | Major tail tube protein     | Hypothetical protein                     |
| 11   | Hypothetical protein             | Hypothetical protein             | GpE family protein               | Tail sheath protein         | Phage related tail transmembrane protein |
| 12   | <b>Phage tail protein</b>        | <b>Phage tail protein</b>        | <b>Phage tail protein</b>        | <b>Phage tail protein</b>   | <b>Hypothetical protein</b>              |
| 13   | Major tail tube protein          | Major tail tube protein          | Major tail tube protein          | Phage tail protein          | Phage tail protein                       |
| 14   | Tail tube protein                | Tail tube protein                | Tail tube protein                | Tail protein                | Major tail tube protein                  |
| 15   | Phage tail protein(Pseudogene)   | Tail fibre assembly protein      | Tail fibre assembly protein      | Base plate assembly protein | Hypothetical protein                     |
| 16   | Phage tail collar domain protein | Phage tail collar domain protein | Phage tail collar domain protein | Base plate assembly protein | Bacteriophage acquired protein           |
| 17   | Tail protein                     | Tail protein                     | Tail protein                     | Base plate assembly protein | Tail fibre protein                       |
| 18   | Base plate assembly protein      | Base plate assembly protein      | Base plate assembly protein      | Fels-2 prophage protein     | Tail fibre protein                       |
| 19   | Base plate assembly protein      | Base plate assembly protein      | Base plate assembly protein      | LysC                        | Base plate assembly protein              |
| 20   | Base plate assembly protein      | Base plate assembly protein      | Base plate assembly protein      | LysB                        | Base plate assembly protein              |
| 21   | Fels-2 prophage protein          | Fels-2 prophage protein          | Fels-2 prophage protein          | Hypothetical protein        | Hypothetical protein                     |
| 22   | LysC                             | LysC                             | LysC                             | Hypothetical protein        | Fels-2 prophage protein                  |
| 23   | LysB                             | LysB                             | LysB                             | Membrane protein            | LysC                                     |
| 24   | Peptidoglycan binding protein    | Hypothetical protein             | Hypothetical protein             | Tail protein                | LysB                                     |
| 25   | Phage encoded membrane protein   | Phage encoded membrane protein   | Phage encoded membrane protein   | Hypothetical protein        | Bacteriophage acquired protein           |
| 26   | Phage encoded membrane protein   | Phage encoded membrane protein   | Phage encoded membrane protein   | Hypothetical protein        | Phage encoded membrane protein           |
| 27   | Tail protein                     | Tail protein                     | Tail protein                     | Hypothetical protein        | Phage encoded membrane protein           |
| 28   | Hypothetical protein             | Hypothetical protein             | Hypothetical protein             | Hypothetical protein        | Phage tail protein X                     |

**Supplementary Figure 9. Homologues of *Bg\_9562* are located in bacteriophage genomic cluster in different *B. gladioli* genomes.** **a**, The genomic organization of *Bg\_9562* gene (filled arrow) in *B. gladioli* strain NGJ1. The number reflects genes that are present along with *Bg\_9562* and their corresponding locus IDs as per *Burkholderia* genome database are mentioned. The involvement of these genes in various phage related functions are underlined. **b**, The genomic organization of *Bg\_9562* homologs in different *B. gladioli* strains. The putative functions of different genes present in that locus are tabulated. The bacteriophage locus seems incomplete in various *B. gladioli* strains as the genes encoding capsid/head assembly proteins are absent.

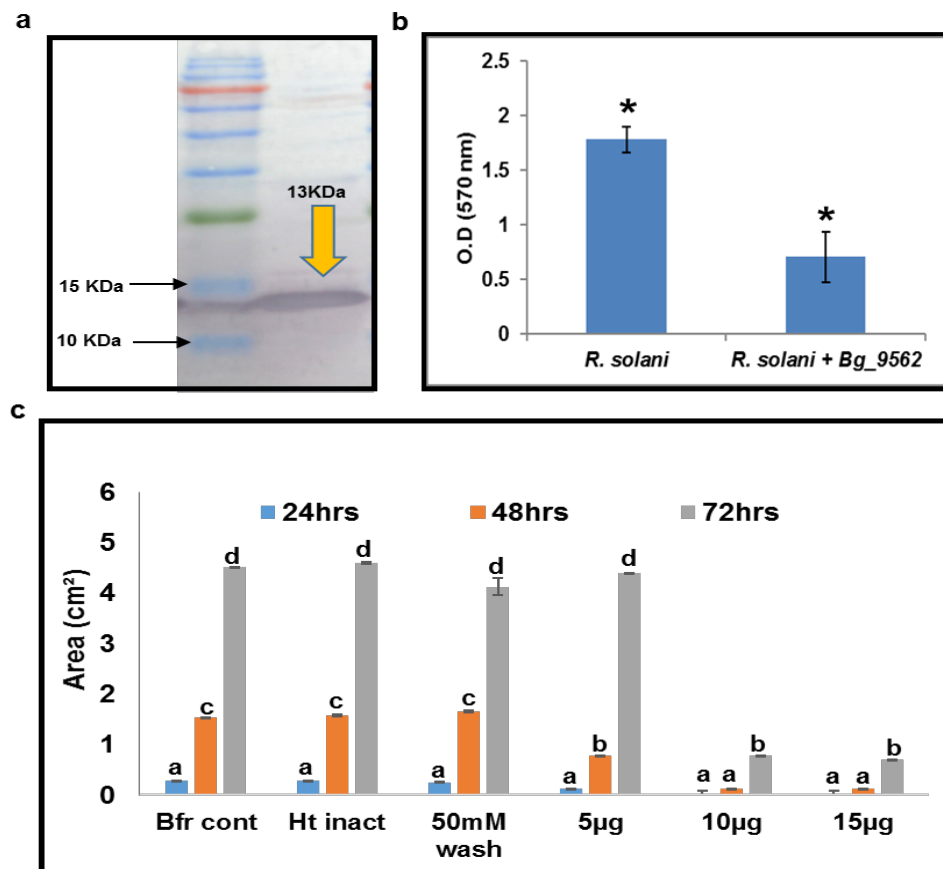

**Supplementary Figure 10. Characterization of Bg\_9562 protein.** **a**, Western blot analysis of recombinant Bg\_9562 protein purified from *E. coli*, using anti-His antibody. **b**, Cell viability estimated by MTT staining of Bg\_9562 protein and buffer treated *R. solani* mycelia. **c**, Fungal growth (area of observed mycelial growth) inhibition observed upon protein treatment. 15 µg/ml of protein was efficient in preventing fungal growth while various control solutions did not affect mycelia growth. The experiments were repeated three times with three replicates. Asterisks and different letters indicate significant difference between indicated groups at  $P<0.001$  and  $P<0.05$  (estimated by one-way ANOVA), respectively. Graphs show mean values  $\pm$  standard deviation.

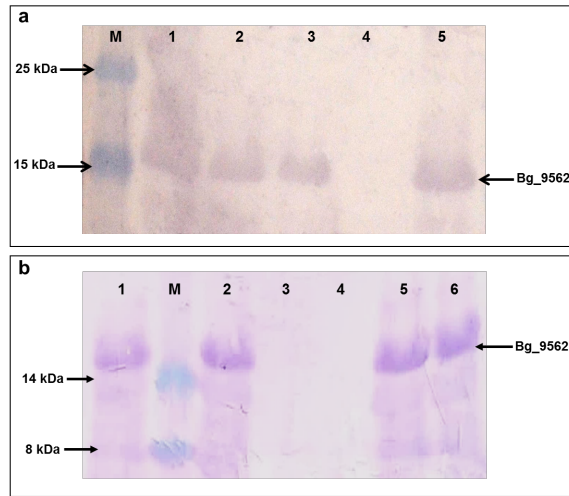

**Supplementary Figure 11. Western blot analysis suggests that during mycophagous interaction NGJ1 translocates the Bg\_9562 protein into *R. solani* using type III secretion system.** Western blot analysis was performed using Bg\_9562 protein specific polyclonal antibody. **a**, NGJ1 translocates Bg\_9562 protein into *R. solani* mycelia. The protein isolated from various samples; NGJ1 pellet (Lane 1), NGJ1 treated mycelia (Lane 2 and 3), untreated mycelia (Lane 4), purified Bg\_9562 protein (Lane 5) along pre-stained protein ladder (M) were blotted. **b**, T3SS mutant strains were defective in translocating the Bg\_9562 protein into *R. solani* mycelia. The protein isolated from various samples; NGJ1 pellet (Lane 1), mycelia treated with NGJ1 (Lane 2), mycelia treated with T3SS mutants: NGJ12 (lane 3) and NGJ13 (Lane 4), bacterial pellet of NGJ12 (lane 5) and NGJ13 (lanes 6) along with pre-stained protein ladder (M) were blotted. The arrow indicates Bg\_9562 specific band. Similar results were obtained in three independent biological replicates.

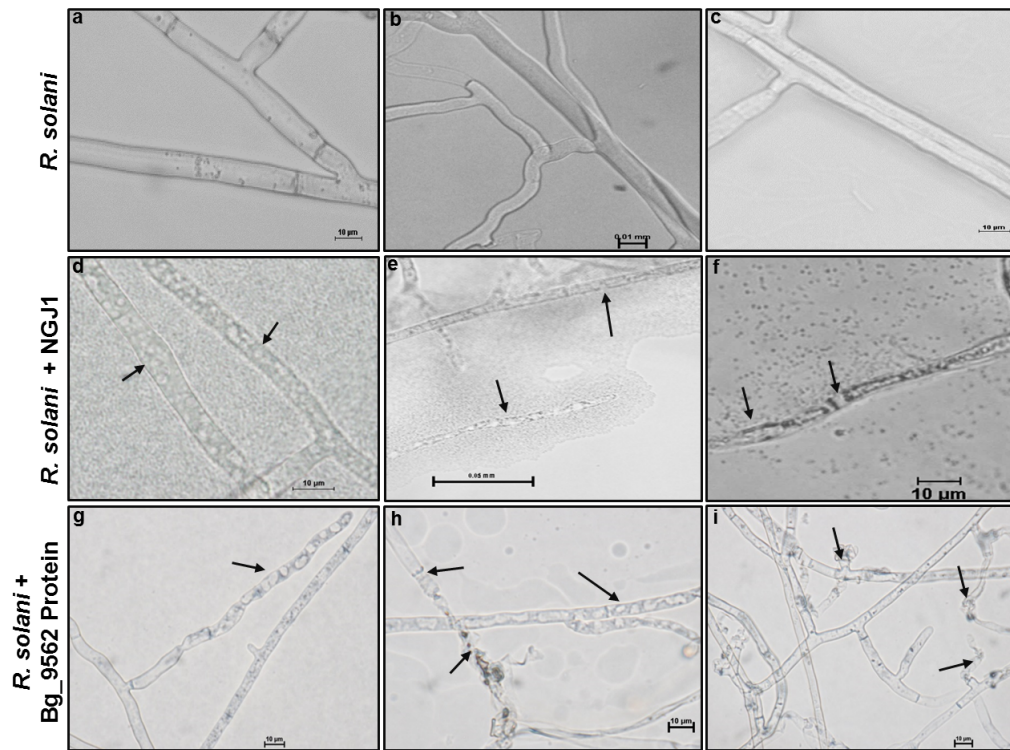

**Supplementary Figure 12. Microscopic analysis of *B. gladioli* strain NGJ1 and Bg\_9562 protein treated *R. solani* mycelia.** **a- c**, Control (untreated) *R. solani* mycelia. **d- f**, Characteristic alterations imparted in *R. solani* mycelia upon co-cultivation with NGJ1. The bacteria caused various structural changes such as membrane disruption, cytoplasm squeezing, hyphal disintegration and release of cytoplasmic granules. **g- i**, Alterations in hyphal integrity, deflated and degenerating hypha etc. were imparted by Bg\_9562 protein treatment. Interestingly alterations caused by protein or bacterial treatment in *R. solani* mycelia were found to be quite similar. Similar results were obtained in at least three independent biological experiments. Arrows highlight the mycelial damage as mentioned above.

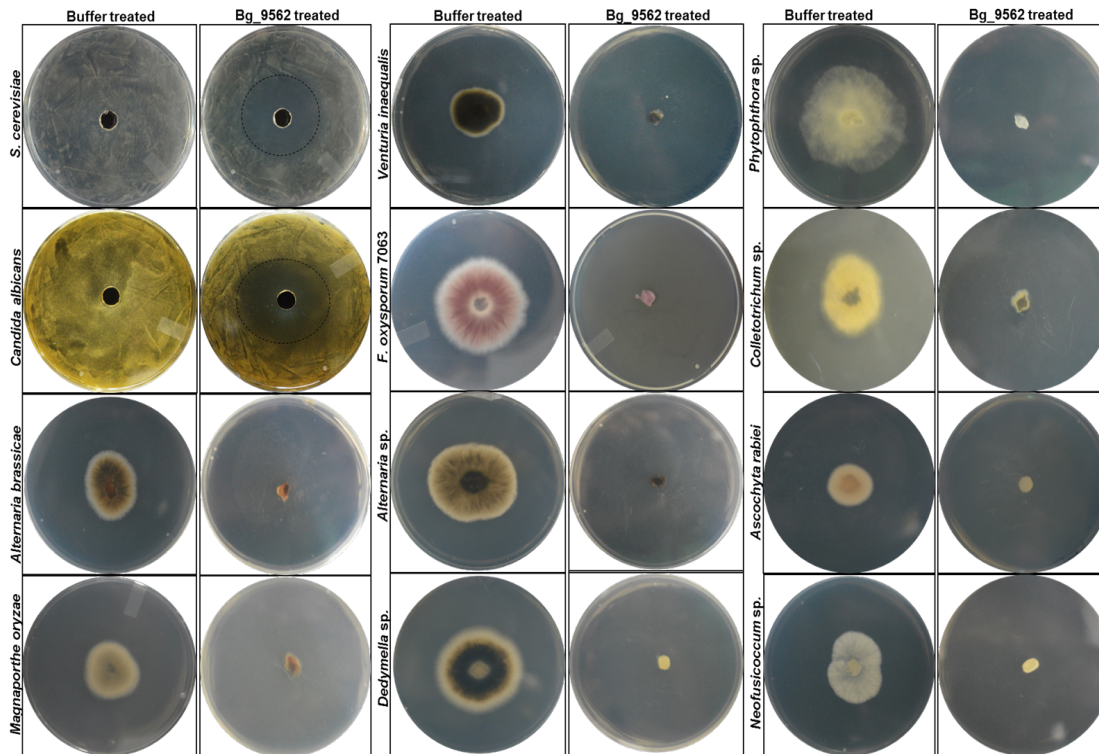

**Supplementary Figure 13. Bg\_9562 protein demonstrates broad spectrum anti-fungal activity.** Bg\_9562 protein shows strong antifungal activity on different fungi that includes *Saccharomyces cerevisiae*, *Candida albicans*, *Alternaria brassicae*, *Magnaporthe oryzae*, *Venturia inaequalis*, *Fusarium oxysporum* 7063, *Alternaria sp.*, *Didymella sp.*, *Phytophthora sp.*, *Colletotrichum sp.*, *Ascochyta rabiei*, *Neofusicoccum sp.* The protein treatment prevented growth of fungi while the buffer treated ones demonstrated optimum growth on PDA plates. For most of the fungi, data represents images of fungal growth at 24h post treatment. However, for slow growing fungi such as *V. inaequalis*, *M. oryzae* and *A. rabiei*, the data is presented at 48h of post treatment. Similar results were obtained in at least three independent biological repeats and only representative images are depicted.

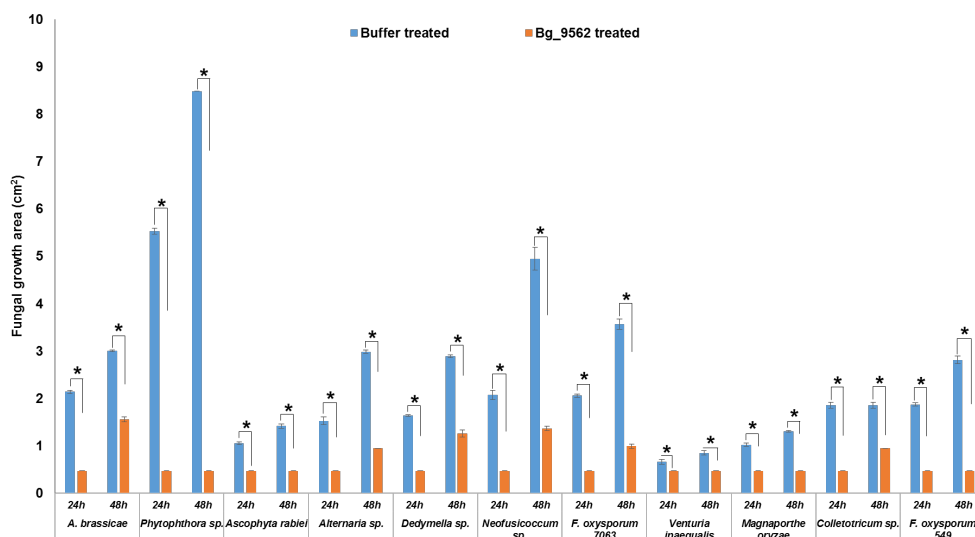

**Supplementary Figure 14. Quantitative analysis of anti-fungal activity of Bg\_9562 protein.** The protein and buffer treated fungi were placed on PDA plates and their radial growth were estimated. The mycelial growth area observed for different fungi during 24h and 48h of growth post treatment is plotted as bar chart. The experiments were repeated with three technical and biological replicates. Asterisks indicate significant differences between indicated groups at  $P < 0.001$  (estimated by one-way ANOVA). Graphs show mean values  $\pm$  standard deviation.

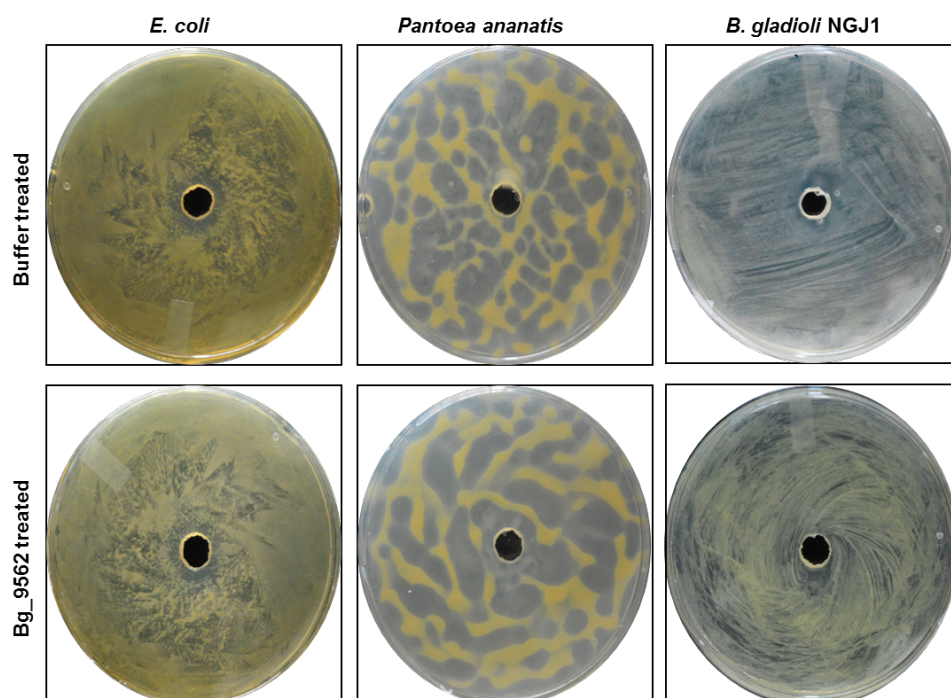

**Supplementary Figure 15. Bg\_9562 protein does not demonstrate anti-bacterial activity.** The Bg\_9562 protein did not inhibit the growth of different bacteria (*B. gladioli*, *P. ananatis* and *E. coli*). The bacterial growth pattern was found to be similar to that observed in case of buffer treated ones. Similar results were obtained in at least three independent experiments and only representative images are depicted.

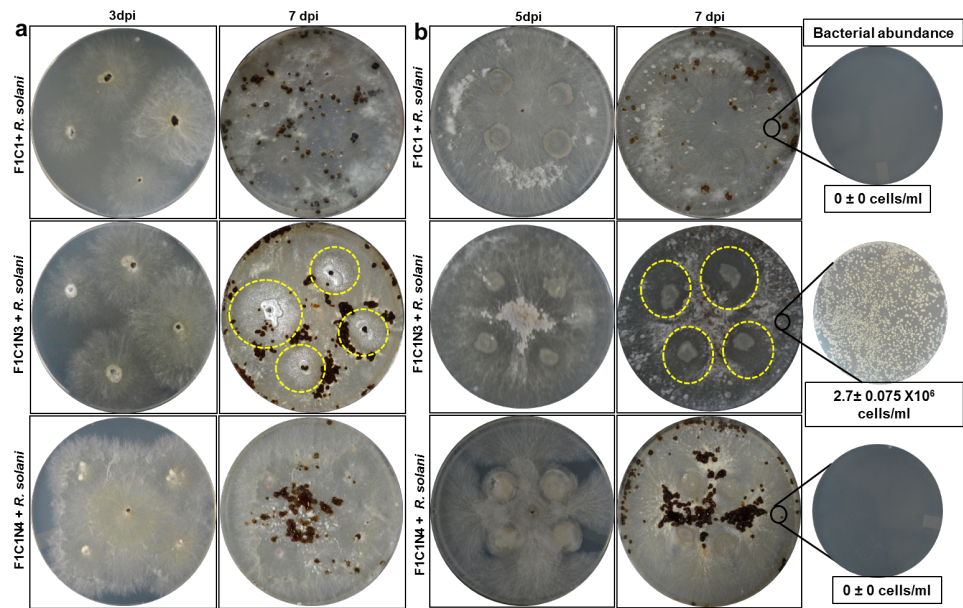

**Supplementary Figure 16. *Ralstonia solanacearum* strain F1C1 expressing *Bg\_9562* gene demonstrates mycophagy on *R. solani* in a functional T3SS dependent manner.** **a**, The *R. solani* sclerotia treated with different strains of *R. solanacearum* (F1C1: wild type, F1C1N3: F1C1 expressing *Bg\_9562*, F1C1N4: T3SS<sup>-</sup> deficient F1C1 expressing *Bg\_9562*) were placed on PDA plates for mycophagous development. The F1C1 and F1C1N4 failed to show mycophagy, while the F1C1N3 demonstrated mycophagous development and spread over fungal mycelia. **b**, Confrontation assay of *R. solani* with different strains of *R. solanacearum*. Upon confrontation, the F1C1N3 strain was found foraging over fungal mycelia while F1C1N4 as well as the F1C1 failed to grow over fungi. The mycophagous zones are highlighted in yellow dotted circles. Further the bacterial abundance on fungal mycelia was estimated by dilution plating on BG-agar plates (the photographs of the plates are shown in inset and corresponding mean  $\pm$  S.D of cfu numbers are mentioned) which suggested that *Bg\_9562* expressing *R. solanacearum* demonstrates mycophagous ability in a T3SS dependent manner. The experiments were repeated with three technical as well as biological replicates and the representative images are shown.

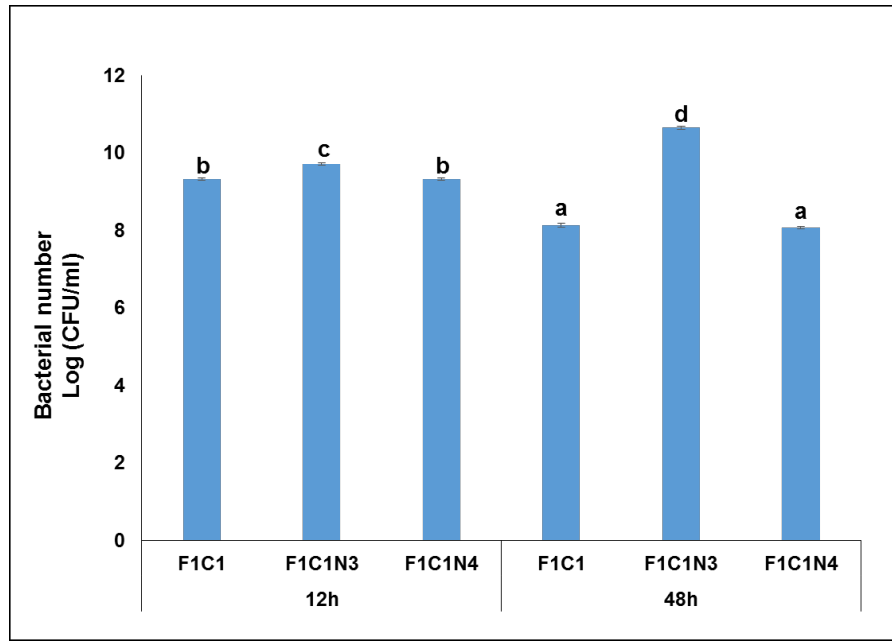

**Supplementary Figure 17. Growth of *R. solanacearum* expressing Bg\_9562 gene is enhanced in presence of *R. solani* mycelia.** The growth rate of different *R. solanacearum* (F1C1, F1C1N3 and F1C1N4) strains were monitored after 24h and 48h of co-cultivation with *R. solani* mycelia in PDB broth by dilution plating on BG-agar plates and colony counting. The graph shows that presence of *R. solani* mycelium stimulated the growth of F1C1N3 in PDB media while the F1C1 as well as F1C1N4 strains failed to grow in presence of *R. solani*. The experiment was repeated with three technical and biological replicates. Values with different letters are significantly different at  $P < 0.001$  (estimated by one-way ANOVA). Graphs show mean values  $\pm$  standard deviation.
